# ACTIVE AND ELECTROGENIC ABSORPTION OF $\text{Na}^+$ AND $\text{Cl}^-$ ACROSS POSTERIOR GILLS OF *ERIOCHEIR SINENSIS*: INFLUENCE OF SHORT-TERM OSMOTIC VARIATIONS

HORST ONKEN

*Institut für Tierphysiologie, Freie Universität Berlin, Grunewaldstraße 34, D-12165 Berlin, Germany*

*Accepted 13 December 1995*

## Summary

Split lamellae of posterior gills of Chinese crabs (*Eriocheir sinensis*) acclimated to fresh water were mounted in a modified Ussing-type chamber, and the transepithelial short-circuit current and conductance were measured. The epithelium shows independent active and electrogenic absorption mechanisms for  $\text{Na}^+$  and  $\text{Cl}^-$  that can be measured as positive and negative short-circuit currents, respectively, in the absence of the counter ion. Increasing the osmolarity of the haemolymph-side saline by addition of sucrose resulted in a marked decrease in active uptake of both  $\text{Na}^+$  and  $\text{Cl}^-$ . In contrast, increasing the internal osmolarity by addition of urea or moderately decreasing the haemolymph-side osmolarity resulted in a marked increase in  $\text{Na}^+$  as well as  $\text{Cl}^-$  transport. Circuit analysis revealed that  $\text{Na}^+$  current changes are mostly due to alterations in the apical amiloride-sensitive  $\text{Na}^+$

conductance, while  $\text{Cl}^-$  current changes are caused not only by alterations in the transcellular conductance but also by changes in the electromotive force for  $\text{Cl}^-$  absorption. Osmotic perturbations in the external bath induced current changes in the same directions, but the magnitudes of the effects were smaller than those after internal osmotic variations, indicating that the external barrier has a lower water permeability than the internal barrier. Short-term osmotic perturbations did not significantly affect the leak conductance, which is not associated with active transport and which may mostly reflect the paracellular conductance.

Key words: crab gill, Chinese crab, *Eriocheir sinensis*, NaCl absorption, osmotic variations, sucrose, urea, Ussing-type chamber, short-circuit current.

## Introduction

Chinese crabs (*Eriocheir sinensis*) spend the greatest proportion of their life in fresh water, where they maintain an outwardly directed osmotic gradient of about 550–650 mosmol  $\text{kg}^{-1}$  by active uptake of NaCl across the posterior gills (Mantel and Farmer, 1983; Péqueux *et al.* 1988). Krogh (1938) demonstrated that *E. sinensis* acclimated to fresh water are able to absorb  $\text{Na}^+$  and  $\text{Cl}^-$  independently from each other. Through the use of split gill lamellae in Ussing-type chambers, the respective mechanisms have been elucidated. Active, electrogenic  $\text{Na}^+$  absorption proceeds as in frog skin *via* apical  $\text{Na}^+$  channels and the basolateral  $\text{Na}^+/\text{K}^+$  pump and can be measured as positive, amiloride-sensitive short-circuit current ( $I_{\text{Na}}$ ) using  $\text{Cl}^-$ -free  $\text{Na}^+$  saline in the external bath (Zeiske *et al.* 1992a). Active, electrogenic  $\text{Cl}^-$  absorption, which is reflected in a negative short-circuit current ( $I_{\text{Cl}}$ ) in the presence of external  $\text{Cl}^-$  saline, proceeds *via* apical  $\text{Cl}^-/\text{HCO}_3^-$  antiport and basolateral  $\text{Cl}^-$  channels (Onken *et al.* 1991) and is driven by an apical V-type  $\text{H}^+$  pump (Putzenlechner *et al.* 1992; Onken and Putzenlechner, 1995).

*E. sinensis* pass the first and last portions of their life cycle in sea water or brackish water (Peters and Panning,

1933). The haemolymph of seawater-adapted *E. sinensis* is approximately iso-osmotic with the ambient medium (900–1000 mosmol  $\text{kg}^{-1}$ ; Mantel and Farmer, 1983). Thus, there is no requirement for NaCl absorption. In fact, the gills of seawater crabs display no net fluxes of  $\text{Na}^+$  (Péqueux and Gilles, 1981) and only low transbranchial potential differences (Onken and Graszynski, 1989), indicating the absence of active and electrogenic salt absorption. In addition to the salinity of the ambient medium, factors that affect the haemolymph osmolarity and/or the permeability of the body surface (such as composition of food, moulting, land visits, etc.) also influence the demand for NaCl uptake. Thus, the freshwater-adapted animals must be able to regulate the magnitude of NaCl absorption. Dopamine has been shown to hyperpolarize the transbranchial potential difference measured in isolated perfused gills of freshwater-adapted crabs with NaCl saline on both sides of the epithelium (Detaille *et al.* 1992). Moreover, it has been reported that a transport-stimulating factor of unknown chemical nature is present in eyestalk extracts of *E. sinensis* acclimated to fresh water (Schöbel *et al.* 1994). The modulation of NaCl uptake across *E. sinensis* gills by

manipulating second messenger systems has been clearly demonstrated (Bianchini and Gilles, 1990; Asselbourg *et al.* 1991; Péqueux and Gilles, 1992; Riestenpatt *et al.* 1994). The absence of any net  $\text{Na}^+$  influx when whole posterior gills of freshwater crabs were treated with high- $\text{NaCl}$  salines (composed according to the haemolymph of seawater animals) was interpreted as a regulation of  $\text{Na}^+$  absorption by the  $\text{Na}^+$  level of the haemolymph (Péqueux and Gilles, 1981). However, when the haemolymph composition changes, its osmolarity also varies. For several vertebrate epithelia, transport modulation by alteration in cell volume induced by changing osmolarity of the body fluid has been demonstrated (for a review, see Macknight, 1991). Thus, it is conceivable that the haemolymph osmolarity itself also directly influences transport magnitude in *E. sinensis* gills.

In the present study, short-term osmotic perturbations on either side of split gill lamella preparations of crabs acclimated to fresh water were monitored. Their influence on the magnitudes of active and electrogenic absorption of  $\text{Na}^+$  and  $\text{Cl}^-$  was also investigated.

Some of these results were reported at the 1993 annual meeting of the Deutsche Zoologische Gesellschaft in Salzburg (Onken *et al.* 1993).

## Materials and methods

### Crabs

Chinese crabs (*Eriocheir sinensis* Milne-Edwards) were obtained from commercial fishermen. The animals were caught in the rivers Eider (Schleswig-Holstein, Germany) or Havel (Brandenburg, Germany). In the laboratory, the animals were kept at 10–12 °C in running tap water (containing, in  $\text{mmol l}^{-1}$ :  $\text{Na}^+$ , 2.0;  $\text{K}^+$ , 0.08;  $\text{Ca}^{2+}$ , 3.0;  $\text{Cl}^-$ , 1.7) for at least 1 month before use. Twice a week, the crabs were fed with frozen fish or carp food (Bertels GmbH, Halstenbek, Germany).

### Preparation

After killing the animals by destroying the ventral ganglia, the carapace was lifted and the three most posterior gills were removed. Under microscopic control, split lamellae, consisting of a single epithelial layer and the adherent cuticle (Schwarz, 1990), were prepared as described by Schwarz and Graszynski (1989). The preparations were carefully mounted in a modified Ussing-type chamber with an epithelial area of 0.01  $\text{cm}^2$ . Continuous perfusion of both chamber compartments (50  $\mu\text{l}$ ) with aerated salines was achieved by gravity flow. The rate of perfusion was adjusted to approximately 2  $\text{ml min}^{-1}$  and was not altered during an experiment.

### Solutions and chemicals

The compositions of the principal salines are given in Table 1. The standard  $\text{NaCl}$  saline was made up according to the haemolymph of animals acclimated to fresh water (see Mantel and Farmer, 1983).

In contrast to former investigations (Onken *et al.* 1991; Zeiske *et al.* 1992a; Riestenpatt *et al.* 1994; Onken and

Putzenlechner, 1995), in the present study nitrate was used instead of gluconate as a substitute for  $\text{Cl}^-$  (see Table 1). However, nitrate is an inhibitor of V-ATPases, acting on the cytosolic side (Nelson, 1987; Schirmanns and Zeiske, 1994) by reversibly dissociating the intracellularly attached  $\text{V}_1$  sector from the transmembrane  $\text{V}_o$  sector (Bowman *et al.* 1992; Forgac, 1992). Because a V-ATPase is involved in active and electrogenic  $\text{Cl}^-$  absorption ( $I_{\text{Cl}}$ ) across the gills of *E. sinensis* (Onken and Putzenlechner, 1995),  $\text{Cl}^-$  replacements with nitrate or gluconate were carried out in preliminary experiments. The effects ( $I_{\text{Cl}}$  decreased) were the same for both substitutions, indicating that the plasma membrane is impermeable to nitrate, as for gluconate. Similarly, using nitrate, no effect was observed on V-ATPase-mediated  $\text{K}^+$  secretion across the midgut of *Manduca sexta* (Zeiske *et al.* 1992b). Nitrate only inhibited the V-ATPase in this tissue after permeabilization of the basolateral membrane with amphotericin B (Schirmanns and Zeiske, 1994).

In order to decrease osmolarity, the salines were mixed with 'hypo saline', which contained only the buffers, calcium gluconate, glucose and  $\text{KNO}_3$ . To increase the osmolarity, 350  $\text{mmol l}^{-1}$  sucrose or urea was added. The osmolalities of the salines were measured using a semimicro osmometer (Knaur, Berlin, Germany) and are given in Table 1 (mean  $\pm$  S.E.M.,  $N=3$ ). Amiloride, kindly provided by Merck, Sharp and Dohme, was used at a concentration of 100  $\mu\text{mol l}^{-1}$ . Diphenylamine-2-carboxylic acid (DPC), obtained from Fluka, was added from a stock solution in dimethylsulphoxide (0.5  $\text{mol l}^{-1}$ ). The solvent alone has no significant effects on the measured parameters (see Onken *et al.* 1991). Theophylline (Serva), which stimulates  $I_{\text{Na}}$  and  $I_{\text{Cl}}$  across the *E. sinensis* gill epithelium (Riestenpatt *et al.* 1994), was employed at a concentration of 5  $\text{mmol l}^{-1}$  when the spontaneous currents were small.

### Electrophysiology

The electrical equipment and measurement of the transepithelial short-circuit current ( $I_{\text{sc}}$ ) and the tissue conductance ( $G_{\text{te}}$ ) have been described in detail elsewhere (Onken *et al.* 1991).

The definitions of the cellular ion-specific currents ( $I_{\text{Na}}$ ,  $I_{\text{Cl}}$ ) and conductances ( $G_{\text{Na}}$ ,  $G_{\text{Cl}}$ ) as well as the definition of the leak conductance ( $G_l$ ) are given in the Results. The electromotive forces for  $\text{Na}^+$  and  $\text{Cl}^-$  absorption ( $E_{\text{Na}}$  and  $E_{\text{Cl}}$ ) were calculated according to Ohm's law:

$$E_x = I_x / G_x,$$

where  $x$  is  $\text{Na}^+$  or  $\text{Cl}^-$ .

The conductances of the solutions were high (approximately 150  $\text{mS cm}^{-2}$ ) compared with those of the tissues. Therefore no corrections to  $G_{\text{te}}$  and  $I_{\text{sc}}$  were necessary to compensate for possible errors arising from voltage-clamping.

### Statistics

All data are given as mean  $\pm$  S.E.M. Differences between groups were tested using paired Student's  $t$ -tests. Statistical significance was taken as  $P < 0.05$ .

## Results

### Characteristics of the split gill lamellae

For 23 split lamellae of freshwater-adapted crabs studied using NaCl saline on both sides, the transepithelial conductance ( $G_{te}$ ) was found to be  $3.62 \pm 0.26 \text{ mS cm}^{-2}$ . In parallel, a negative short-circuit current ( $I_{sc}$ ) of  $-129 \pm 15 \mu\text{A cm}^{-2}$  was measured.

Following Zeiske *et al.* (1992a; see also Fig. 1), active electrogenic  $\text{Na}^+$  absorption was defined as a positive, amiloride-sensitive short-circuit current ( $I_{\text{Na}}$ ) using  $\text{Cl}^-$ -free  $\text{Na}^+$  saline as the external solution and NaCl saline internally. The transcellular  $\text{Na}^+$  conductance ( $G_{\text{Na}}$ ) was defined as an amiloride-induced decrease in  $G_{te}$ . After substituting external NaCl with  $\text{NaNO}_3$ , amiloride-sensitive  $\text{Na}^+$  currents ( $I_{\text{Na}}$ ) of  $244 \pm 28 \mu\text{A cm}^{-2}$  and conductances ( $G_{\text{Na}}$ ) of  $3.00 \pm 0.35 \text{ mS cm}^{-2}$  ( $N=21$ ) were measured. The passive current driven by the outwardly directed  $[\text{Cl}^-]$  gradient (measured during application of amiloride) was very small ( $10\text{--}20 \mu\text{A cm}^{-2}$ ) compared with  $I_{\text{Na}}$  (see Figs 1, 2 and 5; see also Zeiske *et al.* 1992a).

Active and electrogenic  $\text{Cl}^-$  absorption was defined according to Onken *et al.* (1991; see also Fig. 1) as a negative,  $\text{Cl}^-$ -dependent short-circuit current ( $I_{\text{Cl}}$ ) in the presence of external  $\text{Na}^+$ -free  $\text{Cl}^-$  saline and internal NaCl saline sensitive to internal diphenylamine-2-carboxylate (DPC). The cellular  $\text{Cl}^-$  conductance ( $G_{\text{Cl}}$ ) was defined as the difference between  $G_{te}$  for externally  $\text{Na}^+$ -free  $\text{Cl}^-$  saline and the leak conductance ( $G_1$ , see below). In 21 split lamella preparations,  $\text{Cl}^-$ -dependent currents ( $I_{\text{Cl}}$ ) of  $-206 \pm 27 \mu\text{A cm}^{-2}$  and conductances ( $G_{\text{Cl}}$ ) of  $2.46 \pm 0.26 \text{ mS cm}^{-2}$  were found, reflecting active and electrogenic  $\text{Cl}^-$  absorption. The passive currents driven by the outwardly directed  $[\text{Na}^+]$  gradient were very small: inhibition of  $\text{Cl}^-$  absorption with internal DPC (see Fig. 1 and Onken *et al.* 1991) resulted in a nearly complete reduction of the negative short-circuit current.

The leak conductance ( $G_1$ ), which is not associated with active transport and which may mostly reflect the paracellular conductance, was considered to be the remaining  $G_{te}$  after amiloride treatment in either external  $\text{Cl}^-$ -free  $\text{Na}^+$  saline (when studying  $I_{\text{Na}}$ ; see Figs 1, 2 and 5) or NaCl-free saline (when studying  $I_{\text{Cl}}$ ; see Fig. 3). The diuretic was used in the latter case with external NaCl-free saline because an amiloride-sensitive conductance, which is absent in external  $\text{Cl}^-$ -containing salines (see Zeiske *et al.* 1992a; Zeiske and Onken, 1993), was still present under these conditions (see Fig. 1 and Riestenpatt *et al.* 1994). The presence or absence of  $\text{Na}^+$  in the external bath had no influence on  $G_1$ , indicating that the passive paracellular  $\text{Na}^+$  conductance is very low. However, the true paracellular conductance should depend on external  $\text{Cl}^-$  concentration. Thus, the determination described above probably results in a small underestimation of  $G_1$  (and also an overestimation of  $G_{\text{Cl}}$  and an underestimation of  $E_{\text{Cl}}$ ). However, this procedure for determining  $G_1$  and  $G_{\text{Cl}}$  is the best approximation available, because no specific reagent is currently available which quickly, completely and reversibly blocks  $I_{\text{Cl}}$  from the external side. The mean  $G_1$  of 21 split lamellae was found to be  $1.16 \pm 0.07 \text{ mS cm}^{-2}$ .

### Influence of osmotic perturbations

In many epithelia, transport modulation by aniso-osmotic media has been demonstrated (for a review, see Macknight, 1991). For some tissues, it has been shown that this transport modulation occurs concomitantly with cell volume changes. Cell swelling, induced by hypo-osmotic media (Ussing, 1965) or by increasing the solution's osmolarity using a membranepermeant substance (Van Driessche *et al.* 1993), was reportedly accompanied by transport stimulation, whereas transport inhibition was observed (Ussing, 1965) simultaneously with cell shrinking induced by increasing the solution's osmolarity with a membrane-impermeant substance.

Table 1. Composition of the principal salines

| Saline                 | NaCl          | $\text{Na}^+$ | $\text{Cl}^-$ | NaCl-free               | Hyper sucrose  | Hyper urea     | Hypo         | 3NaCl + 1hypo | 1 $\text{Na}^+$ + 3hypo | 1 $\text{Cl}^-$ + 3hypo |
|------------------------|---------------|---------------|---------------|-------------------------|----------------|----------------|--------------|---------------|-------------------------|-------------------------|
| NaCl                   | 300           |               |               |                         | 300            | 300            |              | 225           |                         |                         |
| $\text{NaNO}_3$        |               | 300           |               |                         |                |                |              |               | 75                      |                         |
| CC                     |               |               | 300           |                         |                |                |              |               |                         | 75                      |
| NMG                    |               |               |               | 300                     |                |                |              |               |                         |                         |
| KCl                    | 8             |               | 6             |                         | 8              | 8              |              | 6             |                         | 1.5                     |
| $\text{KNO}_3$         |               | 8             |               | 6                       |                |                | 6            | 1.5           | 6.5                     | 4.5                     |
| $\text{NaHCO}_3$       | 2             | 2             |               |                         | 2              | 2              |              | 1.5           | 0.5                     |                         |
| $\text{KHCO}_3$        |               |               | 2             | 2                       |                |                | 2            | 0.5           | 1.5                     | 2                       |
| Sucrose                |               |               |               |                         | 350            |                |              |               |                         |                         |
| Urea                   |               |               |               |                         |                | 350            |              |               |                         |                         |
| pH 7.6 with Osmolality | Tris<br>587±4 | Tris<br>566±2 | Tris<br>564±3 | $\text{HNO}_3$<br>383±9 | Tris<br>1013±7 | Tris<br>913±12 | Tris<br>41±1 | Tris<br>457±3 | Tris<br>175±6           | Tris<br>177±2           |

All salines contain in addition (in  $\text{mmol l}^{-1}$ ): Hepes, 5; calcium gluconate, 8; glucose, 2.

All concentrations in  $\text{mmol l}^{-1}$ ; osmolality in  $\text{mosmol kg}^{-1}$ .

Osmolality values are mean  $\pm$  S.E.M. ( $N=3$ ).

CC, choline chloride; NMG, *N*-methylglucamine.

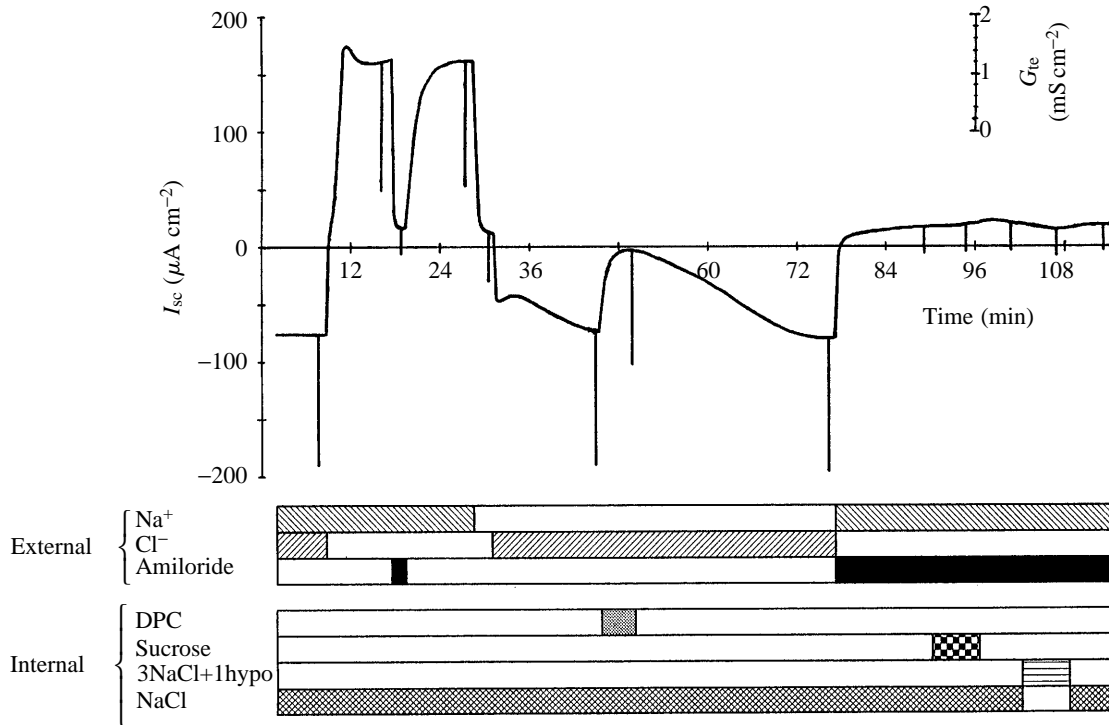

Fig. 1. Time course of the short-circuit current ( $I_{sc}$ ) across a split gill lamella of a posterior gill of *Eriocheir sinensis* adapted to fresh water. The scale for the transepithelial conductance ( $G_{te}$ ) corresponds to the vertical current deflections recorded in response to 50 mV voltage pulses. Applications of internal and external media are shown at the foot of the figure. Amiloride was applied at a concentration of  $100 \mu\text{mol l}^{-1}$ . Diphenylamine-2-carboxylic acid (DPC) was applied at a concentration of  $1 \text{ mmol l}^{-1}$ .  $I_{Na}$  and  $G_{Na}$  were defined as the amiloride-sensitive parts of positive  $I_{sc}$  and of  $G_{te}$ , respectively, using  $\text{Cl}^-$ -free  $\text{Na}^+$  saline as external solution and  $\text{NaCl}$  saline internally ( $t=10\text{--}30$  min). The leak conductance ( $G_l$ ) was defined as  $G_{te}$  in the presence of external amiloride with external  $\text{Cl}^-$ -free  $\text{Na}^+$  saline ( $t=18\text{--}20$  min and  $78\text{--}114$  min) or  $\text{NaCl}$ -free saline (see Fig. 3) and internal  $\text{NaCl}$  saline. When external  $\text{NaCl}$ -free saline without amiloride was used ( $t=30\text{--}32$  min),  $G_{te}$  was significantly larger than  $G_l$ , indicating the presence of an amiloride-sensitive conductance under these conditions (see Riestenpatt *et al.* 1994).  $I_{Cl}$  was defined as the negative  $I_{sc}$  with external  $\text{Na}^+$ -free  $\text{Cl}^-$  saline and internal  $\text{NaCl}$  saline which is sensitive to DPC ( $t=32\text{--}78$  min).  $G_{Cl}$  is defined as the difference between  $G_{te}$  with external  $\text{Na}^+$ -free  $\text{Cl}^-$  saline and  $G_l$ . For  $t=78\text{--}114$  min, the effects of internal hyperosmolarity (addition of  $350 \text{ mmol l}^{-1}$  sucrose) and hypo-osmolarity (3  $\text{NaCl}$ +1 hypo saline) on the leak conductance ( $G_l$ ) are shown.

In the present study, the following manipulations were used to study the influence of osmotic perturbations on  $I_{Na}$  and  $I_{Cl}$  across short-circuited split gill lamellae of *E. sinensis*. The osmolarity of the salines was decreased by dilution with hypo-saline (see Table 1) or increased by addition of membrane-impermeant sucrose. In some experiments, the osmolarity of the internal saline was increased using urea, which is thought to be much more membrane-permeant than sucrose (see Stein, 1990). Of course, sucrose and urea are not significant osmolytes under physiological conditions. These substances simply served as experimental tools in the present investigation.

#### Internal osmotic variations

##### Addition of sucrose

Increasing the internal osmolarity by addition of  $350 \text{ mmol l}^{-1}$  sucrose resulted in a decrease of the  $\text{Na}^+$ - and  $\text{Cl}^-$ -specific currents and conductances. In seven experiments,  $I_{Na}$  was reduced significantly from  $228 \pm 55$  to  $60 \pm 22 \mu\text{A cm}^{-2}$  ( $P < 0.05$ ) and  $G_{Na}$  was reduced significantly from  $3.25 \pm 0.80$

to  $1.18 \pm 0.42 \text{ mS cm}^{-2}$  ( $P < 0.05$ ). The electromotive force of  $\text{Na}^+$  absorption ( $E_{Na}$ ), which is  $I_{Na}/G_{Na}$ , decreased significantly from  $72 \pm 9$  to  $49 \pm 4 \text{ mV}$  ( $P < 0.05$ ). In six experiments,  $I_{Cl}$  was reduced significantly from  $-196 \pm 62$  to  $-56 \pm 22 \mu\text{A cm}^{-2}$  ( $P < 0.05$ ) and  $G_{Cl}$  was reduced significantly from  $2.58 \pm 0.54$  to  $1.77 \pm 0.38 \text{ mS cm}^{-2}$  ( $P < 0.05$ ). The respective electromotive force ( $E_{Cl}$ ) decreased significantly from  $-69 \pm 12$  to  $-28 \pm 10 \text{ mV}$  ( $P < 0.05$ ). Examples of such experiments are shown in Fig. 2 for  $I_{Na}$  and in Fig. 3 for  $I_{Cl}$ . In Fig. 4, the data are summarized as percentages of the control values before increasing the internal osmolarity.  $G_l$  was not affected by internal addition of sucrose (see Figs 1 and 3).

##### Addition of urea

In five experiments, urea was used instead of sucrose to increase the internal osmolarity. In all cases, whether urea alone was used to increase saline osmolarity (not shown) or whether it substituted for sucrose in already hyperosmotic conditions (see Figs 2, 3),  $\text{Na}^+$  and  $\text{Cl}^-$  currents and

conductances increased above the control value obtained with iso-osmotic salines on both sides of the epithelium. Thus, as expected for a membrane-permeant substance (see above), addition of urea mimicked the effect of internally diluted saline (see below).  $G_1$  was not affected by addition of urea to the internal saline (see Figs 2, 3). The transport-stimulating effect of urea was completely reversible (see Figs 2, 3), suggesting that impairment of the structure and function of cell proteins by urea at the concentrations and exposure times used was absent or of minor importance.

#### Reduction of internal osmolarity

Decreasing the internal osmolarity was achieved in two steps (see Fig. 3,  $t=72-126$  min). In the first step, the internal  $\text{Na}^+$  and  $\text{Cl}^-$  concentrations were reduced (to  $226.5$  and  $229.5 \text{ mmol l}^{-1}$ , respectively) at nearly constant osmolarity by substitution of NaCl with *N*-methylglucamine nitrate (3:1 mixture of NaCl saline and NaCl-free saline, see Table 1). In most cases, this manipulation resulted in a slowly reversible drop of the respective currents and conductances. These reduced magnitudes of the ion-specific electrical parameters

after internal reduction of  $\text{Na}^+$  and  $\text{Cl}^-$  levels served as control values for the subsequent osmotic change at constant internal NaCl, buffer and  $\text{Ca}^{2+}$  concentrations, when *N*-methylglucamine nitrate was omitted from the saline. This manipulation (3:1 mixture of NaCl saline and hypo saline) increased  $I_{\text{Na}}$ ,  $I_{\text{Cl}}$ ,  $G_{\text{Na}}$  and  $G_{\text{Cl}}$  (Fig. 4). In five experiments,  $I_{\text{Na}}$  increased significantly from  $96 \pm 15$  to  $236 \pm 36 \mu\text{A cm}^{-2}$  ( $P < 0.05$ ) and  $G_{\text{Na}}$  increased significantly from  $1.08 \pm 0.06$  to  $2.46 \pm 0.35 \text{ mS cm}^{-2}$  ( $P < 0.05$ ), while  $E_{\text{Na}}$  was not significantly affected ( $87 \pm 9 \text{ mV}$  versus  $95 \pm 3 \text{ mV}$ ;  $P > 0.05$ ). In five experiments,  $I_{\text{Cl}}$  increased significantly from  $-128 \pm 26$  to  $-231 \pm 34 \mu\text{A cm}^{-2}$  ( $P < 0.05$ ) and  $G_{\text{Cl}}$  increased significantly from  $1.88 \pm 0.32$  to  $2.48 \pm 0.34 \text{ mS cm}^{-2}$  ( $P < 0.05$ ). As with hyperosmolarity,  $E_{\text{Cl}}$  changed markedly, increasing significantly from  $-74 \pm 18$  to  $-115 \pm 23 \text{ mV}$  ( $P < 0.05$ ). An example of such an experiment for  $I_{\text{Cl}}$  is shown in Fig. 3 ( $t=72-126$  min). In Fig. 4, the respective data are summarized as percentages of the control values before decreasing the internal osmolarity. The leak conductance ( $G_1$ ) was not affected by reducing the osmolarity of the internal medium (see Figs 1, 3).

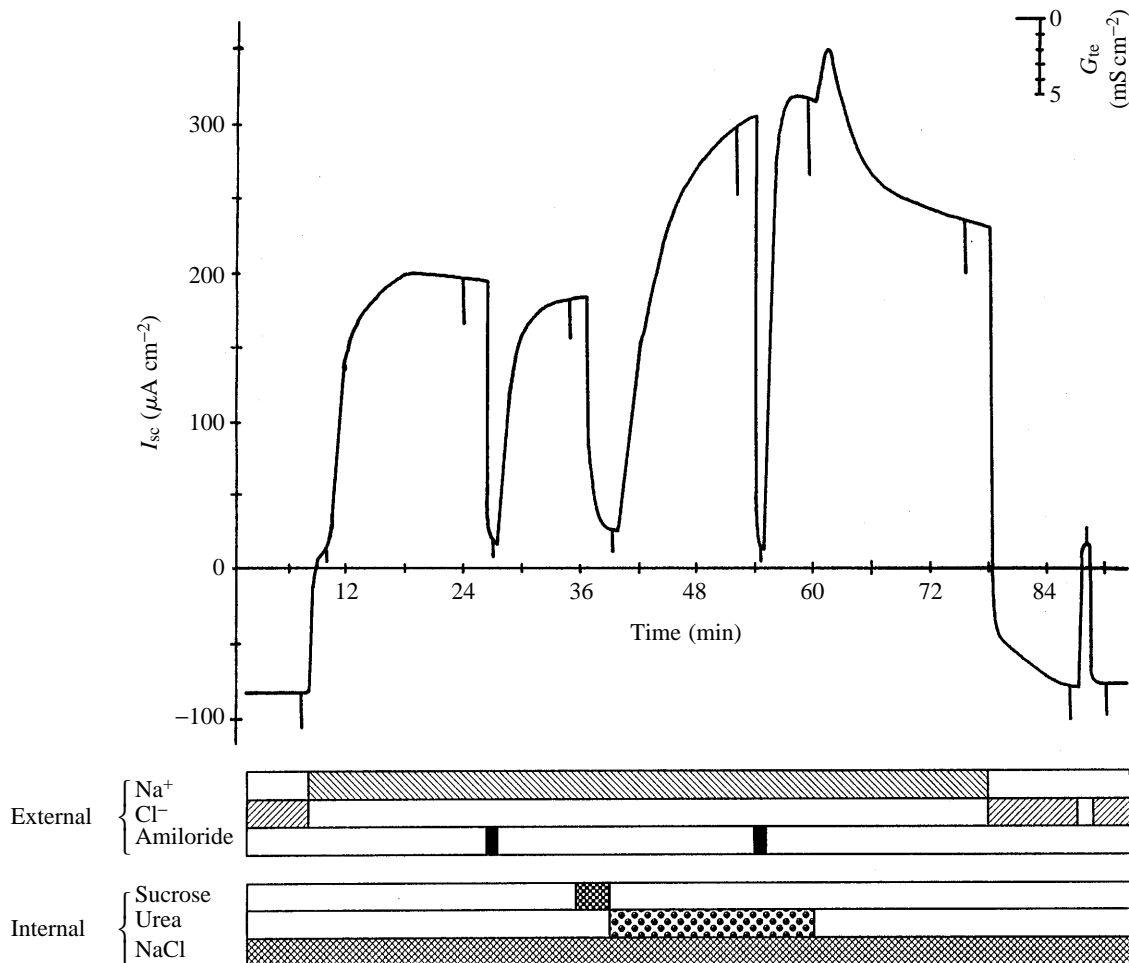

Fig. 2.  $I_{\text{sc}}$  time course showing the influence of internal addition of sucrose or urea (each  $350 \text{ mmol l}^{-1}$ ) on the amiloride-sensitive ( $100 \mu\text{mol l}^{-1}$ ) and  $\text{Na}^+$ -dependent current and conductance with external  $\text{Cl}^-$ -free saline and internal NaCl saline. The scale for the transepithelial conductance ( $G_{\text{te}}$ ) corresponds to the vertical current deflections recorded in response to  $10 \text{ mV}$  voltage pulses.

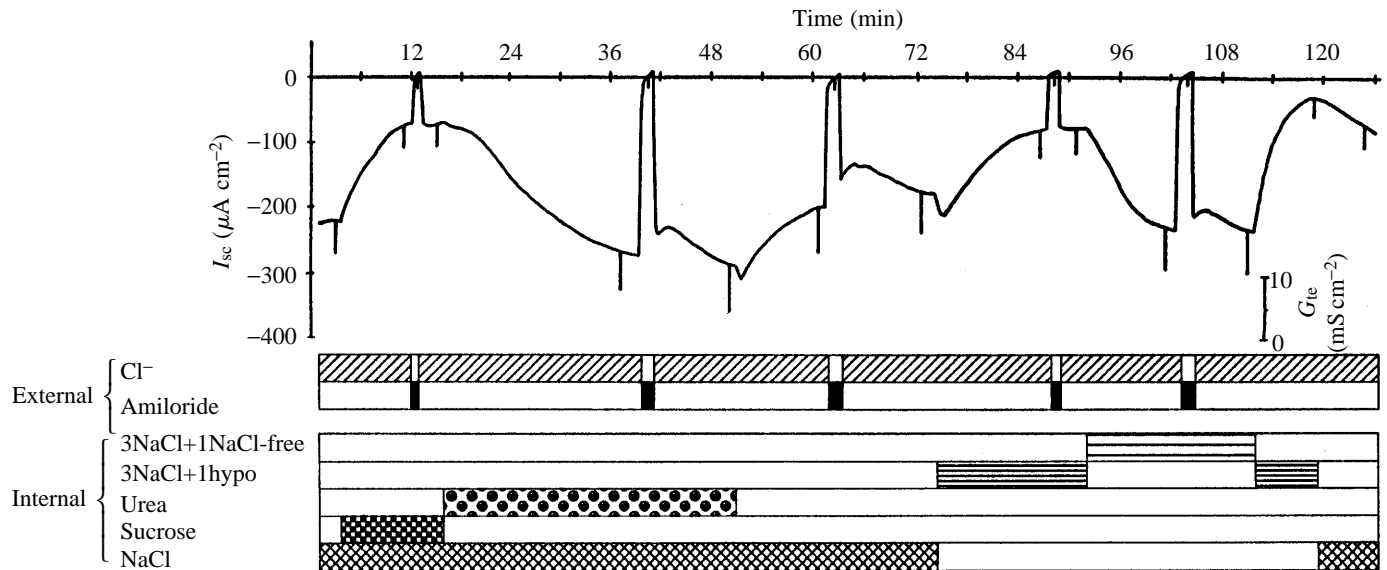

Fig. 3.  $I_{sc}$  time course showing the influence of internal addition of sucrose or urea (each  $350 \text{ mmol l}^{-1}$ ) and internal dilution of NaCl saline with NaCl-free *N*-methylglucamine nitrate saline (3:1) or hypo saline (3:1) on the  $\text{Cl}^-$ -dependent current and conductance with external  $\text{Na}^+$ -free saline. During all experiments,  $5 \text{ mmol l}^{-1}$  theophylline was present in the internal bath. The scale for the transepithelial conductance ( $G_{te}$ ) corresponds to the vertical current deflections recorded in response to 10 mV voltage pulses.

#### External osmotic variations

##### Addition of sucrose

In three experiments, the external osmolarity was increased by addition of  $350 \text{ mmol l}^{-1}$  sucrose. The mean values of  $I_{\text{Na}}$  and  $I_{\text{Cl}}$  slightly but significantly decreased to  $86 \pm 6\%$  ( $P < 0.05$ ) and  $91 \pm 4\%$  ( $P < 0.05$ ) of the original control values, respectively. Thus, the effect of external addition of sucrose is much smaller than the same manipulation in the internal bath, which reduced  $I_{\text{Na}}$  and  $I_{\text{Cl}}$  to  $27 \pm 7\%$  and  $24 \pm 6\%$  of control values, respectively (see above and Fig. 4). An example of external addition of sucrose and its influence on  $I_{\text{Na}}$  is shown in Fig. 5.

##### Reduction of external osmolarity

To investigate the influence of a decrease in the external osmolarity, the external concentrations of  $\text{Na}^+$  or  $\text{Cl}^-$  were first reduced to  $75.5$  or  $76.5 \text{ mmol l}^{-1}$ , respectively, at nearly constant osmolarity. This was achieved by substituting impermeant ions for both  $\text{Na}^+$  and  $\text{Cl}^-$  (1:3 mixtures of  $\text{Na}^+$  or  $\text{Cl}^-$  saline with NaCl-free saline, see Table 1). As expected, this manipulation decreased  $I_{\text{Na}}$  and  $I_{\text{Cl}}$  as well as  $G_{\text{Na}}$  and  $G_{\text{Cl}}$ . These reduced currents and conductances then served as new control values for the following reduction of the external osmolarity by omitting the  $\text{Na}^+$  or  $\text{Cl}^-$  substitute from the saline (1:3 mixtures of  $\text{Na}^+$  or  $\text{Cl}^-$  saline with hypo saline, see Table 1). Thus, in this second step, a reduction of the external osmolarity was achieved at constant substrate, buffer and  $\text{Ca}^{2+}$  concentrations. These hypo-osmotic salines caused  $I_{\text{Na}}$  ( $N=3$ ) and  $I_{\text{Cl}}$  ( $N=3$ ) to increase to  $164 \pm 16$  and  $113 \pm 5\%$ , respectively, of the values in iso-osmotic salines. Although the osmotic gradient was approximately threefold higher than in the experiments with internal osmotic manipulations (see above),

the percentage changes in the current were far lower. Thus, it appears that external hypo-osmolarity was much less effective than internal hypo-osmolarity. An example of a reduction of

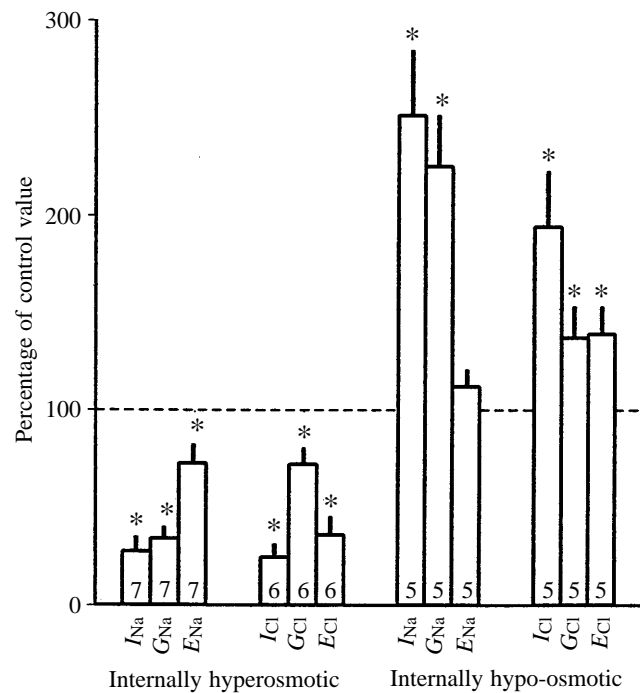

Fig. 4. Diagram summarizing the parameters that characterize active and electrogenic absorption of  $\text{Na}^+$  and  $\text{Cl}^-$  after internal osmotic perturbations. The data are given as percentages (+ S.E.M.) of the control value before osmotic manipulation.  $N$  values are given in each column. Values marked with an asterisk are statistically different ( $P < 0.05$ ) from the control value before osmotic manipulation. For further details, see text.

Fig. 5. Time course of the positive, amiloride-sensitive  $I_{sc}$  with external  $Cl^-$ -free  $Na^+$  saline (internal NaCl saline). Before addition and washout of sucrose ( $350\text{ mmol l}^{-1}$ ) in the external bath, the external  $Cl^-$ -free  $Na^+$  saline was diluted 1:3 with NaCl-free *N*-methylglucamine nitrate saline or hypo saline. Amiloride was applied at a concentration of  $100\ \mu\text{mol l}^{-1}$ . The scale for the transepithelial conductance ( $G_{te}$ ) corresponds to the vertical current deflections recorded in response to 10 mV voltage pulses.

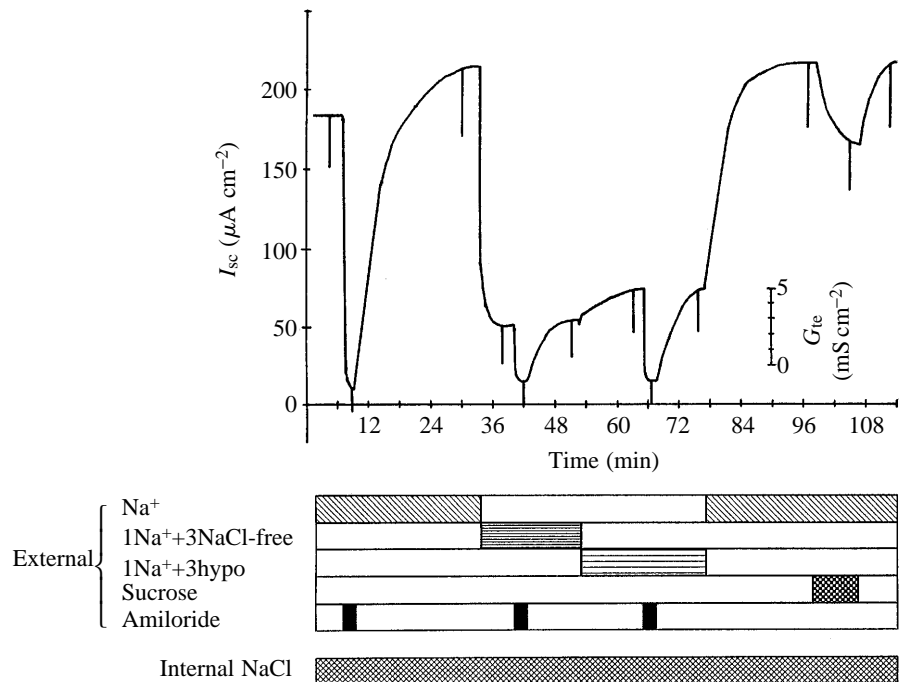

the external osmolarity and its influence on  $I_{Na}$  is shown in Fig. 5.

As in the experiments with internal osmotic manipulations, no influence on the leak conductance ( $G_l$ ) was observed during the experiments with external osmotic variations (see Fig. 5).

## Discussion

### *Ionic variations and their influence on NaCl absorption*

With isolated perfused posterior gills of *E. sinensis* acclimated to fresh water, Péqueux and Gilles (1981) observed that  $Na^+$  influx disappeared when salines of high NaCl concentration (approximately  $500\text{ mmol l}^{-1}$ ) were used to bathe and perfuse the gills. The authors interpreted this result as regulation of active  $Na^+$  absorption by the haemolymph  $Na^+$  level. However, on the basis of the results from the present investigation, it is likely that transport inhibition by high NaCl levels is due to an osmotic effect.

In order to discriminate between effects induced by osmotic or by ionic changes to the bathing solutions,  $Na^+$  and/or  $Cl^-$  concentrations in the present study were first reduced at a constant osmolarity before then decreasing the osmolarity. Decreases in currents ( $I_{Na}$ ,  $I_{Cl}$ ) and conductances ( $G_{Na}$ ,  $G_{Cl}$ ) after external reduction of  $Na^+$  or  $Cl^-$  concentrations at constant osmolarity are obviously due to a reduction in the levels of transport substrate (see Onken *et al.* 1991; Zeiske *et al.* 1992a). In most cases, the reduction in internal NaCl levels at constant osmolarity was followed by a reduction in the currents and conductances (for  $I_{Cl}$  and  $G_{Cl}$ , see Fig. 3). The decrease in  $I_{Cl}$  was not due to inhibition of the V-ATPase by nitrate entering the cells. Substitution of NaCl with either *N*-methylglucamine nitrate or Tris-gluconate caused similar

current decreases, indicating that the basolateral membrane is not permeable to nitrate (see Materials and methods). However, reduction of internal NaCl levels may decrease  $I_{Cl}$  and  $I_{Na}$  by causing cell shrinking (see below and Macknight, 1991), perhaps resulting from KCl loss from the cells (MacRobbie and Ussing, 1961). Moreover, an influence on basolateral (although unproven to date for crab gills)  $Na^+$ - and/or  $Cl^-$ -dependent cotransporters may be of importance. Impairment of these cotransporters may result in changes in the cellular medium (pH,  $[Ca^{2+}]$ , etc.), hence affecting the activity of the transporters responsible for NaCl uptake.

### *Short-term osmotic variations and their influence on NaCl absorption*

When the osmolarity of the internal bathing solution was decreased by dilution with hypo saline or increased by addition of membrane-permeant urea,  $I_{Na}$  and  $I_{Cl}$  increased markedly (Figs 3, 4). A reduction in these currents was observed after increasing the internal osmolarity by addition of membrane-impermeant sucrose (see Figs 2, 3, 4). Osmotic manipulation of the external bath induced current changes in the same directions (see Fig. 5), but the magnitudes of these effects were clearly smaller than those measured after internal osmotic variations. This result indicates that the external barrier (cuticle plus apical membrane) has, as expected for an epithelium facing a dilute external medium under *in vivo* conditions, a lower water permeability than the internal barrier (basolateral membrane). Similar changes in transepithelial transport induced by short-term osmotic perturbations, including the different sensitivities of the apical and basolateral epithelial surfaces, have been observed with other tight NaCl-absorbing epithelia (for a review, see Macknight, 1991). It is likely that

the changes in cellular volume that have been observed for other epithelial tissues (Ussing, 1965; Van Driessche *et al.* 1993) also occur in the gill epithelium of *E. sinensis*.

*Osmotically induced transport modulation is due to modifications of apical transport capacity*

$I_{Na}$  can be completely inhibited by ouabain (Schwarz, 1990; Riestenpatt *et al.* 1994). Therefore,  $E_{Na}$  can be related to the functioning of the basolateral  $Na^+/K^+$ -ATPase and the ion gradients produced and maintained by this enzyme (for a discussion of the concept of  $E_{Na}$ , see Macknight *et al.* 1980). In the present study, changes in  $E_{Na}$  after internal osmotic manipulation were relatively small (see Fig. 4), excluding a major effect of these manipulations on the basolateral  $Na^+/K^+$ -ATPase. As with other epithelia, microelectrode impalements have demonstrated that the apical membrane of the gill epithelium of *E. sinensis* is the barrier along the transcellular pathway with the highest resistance (Onken *et al.* 1991, 1995). Therefore, the changes in transcellular conductance observed after internal osmotic manipulations (see Fig. 4) may be related to modification of the apical  $Na^+$  channels.

With respect to the modulation of  $I_{Cl}$  by internal osmotic variation, circuit analysis shows that the alterations in  $I_{Cl}$  are clearly due to changes in both  $E_{Cl}$  and  $G_{Cl}$  (see Fig. 4). Bafilomycin  $A_1$  is an effective inhibitor of  $I_{Cl}$  (Onken and Putzenlechner, 1995). The changes in  $E_{Cl}$  may therefore be related to the apical V-ATPase and the electrochemical gradients produced and maintained by this enzyme. By pumping  $H^+$  from the cytosol to the apical medium, the V-ATPase produces a  $HCO_3^-$  concentration gradient ('used' for  $Cl^-$  absorption by apical  $Cl^-/HCO_3^-$  antiporters) and an electrical gradient (cell hyperpolarization, 'used' for driving  $Cl^-$  against a chemical gradient across basolateral  $Cl^-$  channels). Because the apical membrane is the barrier of highest resistance along the transcellular route (Onken *et al.* 1991, 1995), changes in  $G_{Cl}$  are also mainly determined by the conductance of the apical V-ATPase, which seems to be associated with the transmembrane  $V_o$  sector of this enzyme (Forgac, 1992). Because internal osmotic variations significantly affected  $E_{Cl}$  and  $G_{Cl}$  in the present study (see Fig. 4), it seems likely that they had a major influence on the apical V-ATPase.

Interestingly, modulation of active and electrogenic absorption of  $Na^+$  and  $Cl^-$  by cellular cyclic AMP (Riestenpatt *et al.* 1994), by internal addition of eyestalk extract (Schöbel *et al.* 1994) or by a decrease in external pH (Onken *et al.* 1994), was mediated by similar changes to those observed in the present study after internal osmotic variations. In all cases, changes in  $I_{Na}$  were caused by changes in  $Na^+$  conductance (at constant electromotive force), whereas alterations in  $I_{Cl}$  were caused by changes in electromotive force and in the conductance for  $Cl^-$ . Transport stimulation induced by increasing cellular cyclic AMP levels has in fact been demonstrated to be caused by increases in the number of open apical  $Na^+$  channels (Riestenpatt *et al.* 1994) and in V-ATPase activity (Putzenlechner and Graszynski, 1995).

In frog skin (Zeiske and Van Driessche, 1984) and in cultured renal (A6) epithelium (Wills *et al.* 1991), osmotic perturbations were reportedly followed by alterations in the number of open apical  $Na^+$  channels. In rabbit urinary bladder (Lewis and de Moura, 1984) and frog skin (Lacoste *et al.* 1993), a hypotonic shock induced fusion of transporter-containing vesicles with the apical membrane. However, in addition to vesicle insertion, two other cellular mechanisms might also be considered (see Benos *et al.* 1992). Aniso-osmotic media may induce modification of pre-existing transporters by membrane stretching/compression and/or by changing the concentrations of cellular transport modulators. More detailed investigations must be conducted in the future on crab gills to demonstrate cell volume changes induced by aniso-osmotic media and to characterize any link with transport modulation.

*The leak conductance of E. sinensis gills shows no osmotic sensitivity*

The paracellular shunt pathway of tight and leaky vertebrate epithelia shows an osmotic sensitivity (for a review, see Erlj and Martinez-Palomo, 1978). Osmotic gradients favouring water efflux induce local accumulations of fluid (so-called 'blisters') near the junctional regions of the intercellular space and increase the leak conductance (DiBona and Civan, 1973). The physiological relevance of the osmotic sensitivity of vertebrate tight junctions has received attention in several reports (e.g. Macknight *et al.* 1980). Lord and DiBona (1976) also observed 'blisters' induced by external hypertonic solutions in the surface epithelium of an invertebrate, the planarian *Dugesia tigrina*. The authors concluded that invertebrate septate junctions possess an osmotic sensitivity similar to that of vertebrate tight junctions. However, in the present investigation, modulation of the leak conductance by osmotic gradients was not observed (see Figs 1, 2, 3, 5). Thus, in the gill epithelium of *E. sinensis*, modulations induced by short-term osmotic variations seem to be restricted to the cellular transport pathway.

*Physiological importance of transport modulation by osmotic changes*

The magnitudes of the internal osmotic variations in the present investigation were chosen according to those encountered by the animals under natural conditions. In sea water, the haemolymph osmolality of *E. sinensis* (about 1000 mosmol  $kg^{-1}$ ) is iso-osmotic with the external medium. When the animals migrate to fresh water, their haemolymph osmolality decreases to 550–650 mosmol  $kg^{-1}$ . In moulting or starving freshwater crabs, a further, reversible decrease to approximately 400 mosmol  $kg^{-1}$  has been observed (Schwabe, 1933). Of course, sudden osmotic variations of the internal medium, as applied in the present study, are never likely to be experienced by the animals. In the laboratory, the animals survive a direct transfer from sea water to fresh water or *vice versa*. However, the precise rate of the resulting haemolymph osmolarity changes is unknown.



The largest natural variation in external and internal osmolarity encountered by *E. sinensis* occurs when the juvenile animals migrate upstream from sea water to fresh water and when the adult crabs return to the sea to reproduce. With respect to a regulative influence of osmotic changes in the external and/or internal medium, it is of importance that, in the isolated epithelia of seawater-adapted crabs, NaCl absorption cannot be induced simply by diluting the salines. With salines made up according to the haemolymph of freshwater crabs, neither a net Na<sup>+</sup> influx (Péqueux and Gilles, 1981) nor any active short-circuit current (H. Onken, unpublished observation) can be measured across the gill epithelium of crabs acclimated to sea water. After transfer of seawater crabs to fresh water, gill Na<sup>+</sup>/K<sup>+</sup>-ATPase activity increases for about 2 days and major ultrastructural changes (increasing numbers of mitochondria, extension of apical infolding system, etc.) can be observed (Péqueux *et al.* 1988). On the basis of these observations, it can be assumed that transbranchial NaCl absorption in seawater-adapted crabs is the result of adaptive cellular responses. This more time-consuming adaptation may be initiated by a reduction in haemolymph osmolarity. However, the process is also likely to involve hormonal and/or neuronal control. Transfer of another crab species, the shore crab *Carcinus maenas*, from full-strength sea water to diluted sea water was followed by rapid changes in catecholamine concentrations in the haemolymph and gill tissue (Zatta, 1987).

After the generation of a transbranchial salt uptake by long-term adaptation (during periods of days) of the crabs to fresh water, the responses of NaCl absorption following short-term manipulations (over minutes) of the internal osmolarity are exactly those required to maintain NaCl homeostasis of the whole animal: an increased/decreased passive water gain and/or salt loss, resulting in dilution/concentration of the body fluid, can be compensated for by stimulation/inhibition of NaCl absorption. Because the results of the present investigation were obtained using isolated epithelia, the observed modulation of NaCl absorption obviously reflects a possible hormone-independent autoregulation. Thus, for *E. sinensis* living in fresh water, it may well be that the adaptive significance of autoregulation is that it allows the animal to compensate for moderate, irregular perturbations of NaCl homeostasis induced by food uptake (quantity and/or composition), by land visits or during moulting phases. Moreover, the mechanisms described may be important in inhibiting NaCl absorption when adult *E. sinensis* return to the sea for reproduction. During this phase, the animals pass through estuarine habitats, which are characterized by regular, fast and drastic changes in external osmolarity. These variations may effect changes in haemolymph osmolarity that can be buffered by subsequent reduction or stimulation of NaCl absorption.

This work was supported by the Deutsche Forschungsgemeinschaft. Technical assistance by Mrs C. Schirmer is gratefully acknowledged. I am indebted to Dr K.

Graszynski, Dr M. Putzenlechner and Dr W. Zeiske for their discussions and helpful suggestions.

### References

- ASSELBOURG, V., TRAUSCH, G., GILLES, R. AND DEVOS, P. (1991). Protein kinase C and ion transport in the posterior gills of the Chinese crab *Eriocheir sinensis*. *Mar. Biol.* **109**, 115–119.
- BENOS, D. J., CUNNINGHAM, S., BAKER, R. R., BEASON, K. B., OH, Y. AND SMITH, P. R. (1992). Molecular characteristics of amiloride-sensitive sodium-channels. *Rev. Physiol. Biochem. Pharmac.* **120**, 31–111.
- BIANCHINI, A. AND GILLES, R. (1990). Cyclic AMP as a modulator of NaCl transport in gills of the euryhaline Chinese crab *Eriocheir sinensis*. *Mar. Biol.* **104**, 191–195.
- BOWMAN, B. J., DSCHIDA, W. J. AND BOWMAN, E. J. (1992). Vacuolar ATPase of *Neurospora crassa*: electron microscopy, gene characterization and gene inactivation/mutation. *J. exp. Biol.* **172**, 57–66.
- DETAILLE, D., TRAUSCH, G. AND DEVOS, P. (1992). Dopamine as a modulator of ionic transport and glycolytic fluxes in the gills of the Chinese crab, *Eriocheir sinensis*. *Comp. Biochem. Physiol.* **103C**, 521–526.
- DiBONA, D. R. AND CIVAN, M. M. (1973). Pathways for movement of ions and water across toad urinary bladder. I. Anatomic site of transepithelial shunt pathways. *J. Membr. Biol.* **12**, 101–128.
- ERLIJ, D. AND MARTINEZ-PALOMO, A. (1978). Role of tight junctions in epithelial function. In *Membrane Transport in Biology*, vol. 3 (ed. G. Giebisch, D. Tosteson and H. H. Ussing), pp. 27–53. Berlin, Heidelberg, New York: Springer.
- FORGAC, M. (1992). Structure, function and regulation of the coated vesicle V-ATPase. *J. exp. Biol.* **172**, 155–169.
- KROGH, A. (1938). The active absorption of ions in some freshwater animals. *Z. vergl. Physiol.* **25**, 335–350.
- LACOSTE, I., BROCHIERO, E. AND EHRENFELD, J. (1993). Control of Na<sup>+</sup> and H<sup>+</sup> transport by exocytosis/endocytosis phenomena in a tight epithelium. *J. Membr. Biol.* **134**, 197–212.
- LEWIS, S. A. AND DE MOURA, J. (1984). Apical membrane area of rabbit urinary bladder increases by fusion of intracellular vesicles: An electrophysiological study. *J. Membr. Biol.* **82**, 123–136.
- LORD, B. A. P. AND DiBONA, D. R. (1976). Role of septate junction in the regulation of paracellular transepithelial flow. *J. Cell Biol.* **71**, 967–972.
- MACKNIGHT, A. D. C. (1991). Volume regulation in epithelia. In *Advances in Comparative and Environmental Physiology*, vol. 9 (ed. R. Gilles, E. K. Hoffmann and L. Bolis), pp. 3–42. Berlin, Heidelberg: Springer.
- MACKNIGHT, A. D. C., DiBONA, D. R. AND LEAF, A. (1980). Sodium transport across toad urinary bladder: A model 'tight' epithelium. *Physiol. Rev.* **60**, 615–715.
- MACROBBIE, E. A. C. AND USSING, H. H. (1961). Osmotic behaviour of the epithelial cells of frog skin. *Acta physiol. scand.* **53**, 348–365.
- MANTEL, L. H. AND FARMER, L. L. (1983). Osmotic and ionic regulation. In *The Biology of Crustacea*, vol. 5 (ed. D. E. Bliss and L. H. Mantel), pp. 54–126. London: Academic Press.
- NELSON, N. (1987). The vacuolar proton-ATPase of eukaryotic cells. *BioEssays* **7**, 251–254.
- ONKEN, H. AND GRASZYNSKI, K. (1989). Active Cl<sup>-</sup> absorption by the Chinese crab (*Eriocheir sinensis*) gill epithelium measured by transepithelial potential difference. *J. comp. Physiol.* **159B**, 21–28.

- ONKEN, H., GRASZYNSKI, K., JOHANSEN, A., PUTZENLECHNER, M., RIESTENPATT, S., SCHIRMER, C., SIEBERS, D. AND ZEISKE, W. (1995). How to overcome osmotic stress? Marine crabs conquer freshwater. New insights from modern electrophysiology. *Helgoländer Meeresunters.* **49**, 715–725.
- ONKEN, H., GRASZYNSKI, K. AND RANAGAT, M. (1994). Modulation of NaCl absorption across the gill epithelium of *Eriocheir sinensis* by external H<sup>+</sup>. *Verh. dt. zool. Ges.* **87**, 187.
- ONKEN, H., GRASZYNSKI, K. AND ZEISKE, W. (1991). Na<sup>+</sup>-independent electrogenic Cl<sup>-</sup> uptake across the posterior gills of the Chinese crab (*Eriocheir sinensis*): Voltage-clamp and microelectrode studies. *J. comp. Physiol.* **161B**, 293–301.
- ONKEN, H. AND PUTZENLECHNER, M. (1995). A V-ATPase drives active, electrogenic and Na<sup>+</sup>-independent Cl<sup>-</sup> absorption across the gills of *Eriocheir sinensis*. *J. exp. Biol.* **198**, 767–774.
- ONKEN, H., ZEISKE, W. AND GRASZYNSKI, K. (1993). Osmotic influences on electrogenic uptake of Na<sup>+</sup> and Cl<sup>-</sup> across the gill epithelium of the Chinese crab *Eriocheir sinensis*. *Verh. dt. zool. Ges.* **86**, 108.
- PÉQUEUX, A. AND GILLES, R. (1981). Na<sup>+</sup> fluxes across isolated perfused gills of the Chinese crab *Eriocheir sinensis*. *J. exp. Biol.* **92**, 173–186.
- PÉQUEUX, A. AND GILLES, R. (1992). Calmodulin as a modulator of NaCl transport in the posterior salt-transporting gills of the Chinese crab *Eriocheir sinensis*. *Mar. Biol.* **113**, 65–69.
- PÉQUEUX, A., GILLES, R. AND MARSHALL, W. S. (1988). NaCl transport in gills and related structures. In *Advances in Comparative and Environmental Physiology*, vol. 1 (ed. R. Greger), pp. 1–73. Berlin, Heidelberg: Springer.
- PETERS, N. AND PANNING, A. (1933). *Die Chinesische Wollhandkrabbe (Eriocheir sinensis H. Milne-Edwards) in Deutschland*. Leipzig: Akademische Verlagsgesellschaft.
- PUTZENLECHNER, M. AND GRASZYNSKI, K. (1995). Regulation of the V-type proton pump in the gills of the Chinese crab *Eriocheir sinensis*. *Verh. dt. zool. Ges.* **88**, 124.
- PUTZENLECHNER, M., ONKEN, H., KLEIN, U. AND GRASZYNSKI, K. (1992). Electrogenic Cl<sup>-</sup>-uptake across the gill epithelium of *Eriocheir sinensis*: energized by a V-type proton-ATPase? *Verh. dt. zool. Ges.* **85**, 160.
- RIESTENPATT, S., ZEISKE, W. AND ONKEN, H. (1994). Cyclic AMP stimulation of electrogenic uptake of Na<sup>+</sup> and Cl<sup>-</sup> across the gill epithelium of the Chinese crab *Eriocheir sinensis*. *J. exp. Biol.* **188**, 159–174.
- SCHIRMANN, K. AND ZEISKE, W. (1994). An investigation of the midgut K<sup>+</sup> pump of the tobacco hornworm (*Manduca sexta*) using specific inhibitors and amphotericin B. *J. exp. Biol.* **188**, 191–204.
- SCHÖBEL, A., GRASZYNSKI, K. AND ONKEN, H. (1994). Modulation of NaCl absorption across the gill epithelium of *Eriocheir sinensis* by eyestalk extracts. *Verh. dt. zool. Ges.* **87**, 195.
- SCHWABE, E. (1933). Über die Osmoregulation verschiedener Krebse (Malacostracen). *Z. vergl. Physiol.* **19**, 183–235.
- SCHWARZ, H.-J. (1990). Elektrophysiologische Untersuchungen des transepithelialen Natrium-Transportes isolierter, halbiertes Kiemenplättchen posteriorer Kiemen der Wollhandkrabbe *Eriocheir sinensis* und der Winkerkrabbe *Uca tangeri*. PhD thesis, Freie Universität Berlin, Germany.
- SCHWARZ, H.-J. AND GRASZYNSKI, K. (1989). Ion transport in crab gills: A new method using isolated half platelets of *Eriocheir* gills in an Ussing-type chamber. *Comp. Biochem. Physiol.* **92A**, 601–604.
- STEIN, W. D. (1990). *Channels, Carriers and Pumps. An Introduction to Membrane Transport*. San Diego: Academic Press.
- USSING, H. H. (1965). Relationship between osmotic reactions and active sodium transport in the frog skin epithelium. *Acta physiol. scand.* **63**, 141–155.
- VAN DRIESSCHE, W., DE SMET, P. AND RASKIN, G. (1993). An automatic monitoring system for epithelial cell height. *Pflügers Arch.* **425**, 164–171.
- WILLS, N. K., MILLINOFF, L. P. AND CROWE, W. E. (1991). Na<sup>+</sup> channel activity in cultured renal (A6) epithelium: Regulation by solution osmolarity. *J. Membr. Biol.* **121**, 79–90.
- ZATTA, P. (1987). Dopamine, noradrenaline and serotonin during hypo-osmotic stress of *Carcinus maenas*. *Mar. Biol.* **96**, 479–481.
- ZEISKE, W. AND ONKEN, H. (1993). Modification of the electrogenic Na<sup>+</sup> absorption by the gill of the Chinese crab following external or internal [Cl<sup>-</sup>] changes. *Verh. dt. zool. Ges.* **86**, 131.
- ZEISKE, W., ONKEN, H., SCHWARZ, H.-J. AND GRASZYNSKI, K. (1992a). Invertebrate epithelial Na<sup>+</sup> channels: amiloride-induced current-noise in crab gill. *Biochim. biophys. Acta* **1105**, 245–252.
- ZEISKE, W., SCHRÖDER, H. AND ALPERT, G. (1992b). K<sup>+</sup> current stimulation by Cl<sup>-</sup> in the midgut epithelium of tobacco hornworm (*Manduca sexta*). I. Kinetics and effect of Cl<sup>-</sup>-site-specific agents. *J. comp. Physiol.* **162**, 331–339.
- ZEISKE, W. AND VAN DRIESSCHE, W. (1984). The sensitivity of apical Na<sup>+</sup> permeability in frog skin to hypertonic stress. *Pflügers Arch.* **400**, 130–139.
